# Supplementary material
Source: Frontiers journal article supplement (https://www.frontiersin.org/articles/537151)
Supplement: Table_4.XLS [file Table_4.XLS]

## Sheet: Table S
	Map	Count1	Count2	Count3	Count4	p	q	Name	Gene_in_background	Gene_in_DE	Links	Result
W3d VS Q3d	map04961	13	26	108	3114	4.76366e-10	1.44339e-07	Endocrine and other factor-regulated calcium reabsorption	XM_001121773.3|K01540;XM_003250943.2|K05858;XM_006559444.1|K07904;XM_006562576.1|K04634;XM_006562577.1|K04634;XM_006562578.1|K04634;XM_006562579.1|K04634;XM_006562581.1|K04634;XM_006564159.1|K01539;XM_006564160.1|K01539;XM_006564161.1|K01539;XM_006564162.1|K01539;XM_006564164.1|K01539;XM_006564165.1|K01539;XM_006564166.1|K01539;XM_006564369.1|K08049;XM_006566836.1|K04585;XM_006566837.1|K04585;XM_…	XM_006564369.1|K08049;XM_006568406.1|K01528;XM_006568407.1|K01528;XM_006568408.1|K01528;XM_006568409.1|K01528;XM_006568410.1|K01528;XM_006568411.1|K01528;XM_006568412.1|K01528;XM_006568413.1|K01528;XM_006568414.1|K01528;XM_006568416.1|K01528;XM_006568417.1|K01528;XM_394399.5|K01528	http://www.kegg.jp/pathway/map04961+K08049+K01528+K01528+K01528+K01528+K01528+K01528+K01528+K01528+K01528+K01528+K01528+K01528	yes
	map03018	12	38	109	3102	1.45042e-07	2.19739e-05	RNA degradation	NM_001278327.1|K12605;XM_001120377.3|K12571;XM_001121212.3|K12626;XM_003249333.2|K11600;XM_003251489.2|K12626;XM_003251670.2|K12598;XM_006557350.1|K01148;XM_006558241.1|K10643;XM_006558242.1|K10643;XM_006558243.1|K10643;XM_006558244.1|K10643;XM_006558245.1|K10643;XM_006558247.1|K10643;XM_006558248.1|K10643;XM_006559764.1|K14442;XM_006559766.1|K14442;XM_006562343.1|K13126;XM_006562587.1|K12603;XM_…	XM_006557350.1|K01148;XM_006558241.1|K10643;XM_006558242.1|K10643;XM_006558243.1|K10643;XM_006558244.1|K10643;XM_006558245.1|K10643;XM_006558247.1|K10643;XM_006558248.1|K10643;XM_006564288.1|K12600;XM_006565495.1|K12604;XM_392167.5|K01148;XM_397381.5|K12585	http://www.kegg.jp/pathway/map03018+K01148+K10643+K10643+K10643+K10643+K10643+K10643+K10643+K12600+K12604+K01148+K12585	yes
	map04721	12	46	109	3094	8.27751e-07	5.55042e-05	Synaptic vesicle cycle	XM_001121312.3|K12302;XM_003251628.2|K02144;XM_006558663.1|K12302;XM_006558664.1|K12302;XM_006558665.1|K12302;XM_006558666.1|K12302;XM_006558667.1|K12302;XM_006561356.1|K12302;XM_006561357.1|K12302;XM_006562544.1|K12302;XM_006562545.1|K12302;XM_006562546.1|K12302;XM_006562557.1|K14636;XM_006563583.1|K08155;XM_006563584.1|K08155;XM_006563585.1|K08155;XM_006564915.1|K13504;XM_006564920.1|K13504;XM_…	XM_006568406.1|K01528;XM_006568407.1|K01528;XM_006568408.1|K01528;XM_006568409.1|K01528;XM_006568410.1|K01528;XM_006568411.1|K01528;XM_006568412.1|K01528;XM_006568413.1|K01528;XM_006568414.1|K01528;XM_006568416.1|K01528;XM_006568417.1|K01528;XM_394399.5|K01528	http://www.kegg.jp/pathway/map04721+K01528+K01528+K01528+K01528+K01528+K01528+K01528+K01528+K01528+K01528+K01528+K01528	yes
	map00533	6	5	115	3135	9.1591e-07	5.55042e-05	Glycosaminoglycan biosynthesis - keratan sulfate	XM_003251117.2|K00741;XM_006557253.1|K07968;XM_006557255.1|K07968;XM_006557256.1|K07968;XM_006568013.1|K00741;XM_006568014.1|K00741;XM_006568016.1|K00741;XM_006568017.1|K00741;XM_006568018.1|K00741;XM_006568019.1|K09671|K04746;XM_624520.4|K07968	XM_003251117.2|K00741;XM_006568013.1|K00741;XM_006568014.1|K00741;XM_006568016.1|K00741;XM_006568017.1|K00741;XM_006568018.1|K00741	http://www.kegg.jp/pathway/map00533+K00741+K00741+K00741+K00741+K00741+K00741	yes
	map00601	6	5	115	3135	9.1591e-07	5.55042e-05	Glycosphingolipid biosynthesis - lacto and neolacto series	XM_003251117.2|K00741;XM_006557253.1|K07968;XM_006557255.1|K07968;XM_006557256.1|K07968;XM_006560474.1|K03766;XM_006568013.1|K00741;XM_006568014.1|K00741;XM_006568016.1|K00741;XM_006568017.1|K00741;XM_006568018.1|K00741;XM_624520.4|K07968	XM_003251117.2|K00741;XM_006568013.1|K00741;XM_006568014.1|K00741;XM_006568016.1|K00741;XM_006568017.1|K00741;XM_006568018.1|K00741	http://www.kegg.jp/pathway/map00601+K00741+K00741+K00741+K00741+K00741+K00741	yes
	map05100	12	58	109	3082	6.7607e-06	0.000341416	Bacterial invasion of epithelial cells	NM_001185105.1|K02105;NM_001185145.1|K05692;XM_003249595.2|K04438;XM_006557798.1|K02105;XM_006557799.1|K02105;XM_006557800.1|K02105;XM_006557802.1|K02105;XM_006557803.1|K02105;XM_006560103.1|K05704;XM_006560104.1|K05704;XM_006560218.1|K04438;XM_006563384.1|K05691;XM_006563385.1|K05691;XM_006564440.1|K05719;XM_006565333.1|K16939;XM_006565334.1|K16939;XM_006566286.1|K06279;XM_006566287.1|K06279;XM_…	XM_006568406.1|K01528;XM_006568407.1|K01528;XM_006568408.1|K01528;XM_006568409.1|K01528;XM_006568410.1|K01528;XM_006568411.1|K01528;XM_006568412.1|K01528;XM_006568413.1|K01528;XM_006568414.1|K01528;XM_006568416.1|K01528;XM_006568417.1|K01528;XM_394399.5|K01528	http://www.kegg.jp/pathway/map05100+K01528+K01528+K01528+K01528+K01528+K01528+K01528+K01528+K01528+K01528+K01528+K01528	yes
	map04113	7	21	114	3119	5.03758e-05	0.00218055	Meiosis - yeast	XM_003250926.2|K02214;XM_006558237.1|K03359;XM_006558305.1|K02542;XM_006558306.1|K02542;XM_006558307.1|K02542;XM_006558712.1|K03353;XM_006560465.1|K06639;XM_006560466.1|K06639;XM_006560467.1|K06639;XM_006560468.1|K06639;XM_006560469.1|K06639;XM_006560470.1|K06639;XM_006562757.1|K03456;XM_006564100.1|K03351;XM_006564101.1|K03351;XM_006565998.1|K02537;XM_006567869.1|K02209;XM_006569248.1|K06628;XM_…	XM_006564100.1|K03351;XM_006564101.1|K03351;XM_006567869.1|K02209;XM_006569248.1|K06628;XM_393296.5|K06269;XM_623270.4|K06269;XM_624289.4|K02209	http://www.kegg.jp/pathway/map04113+K03351+K03351+K02209+K06628+K06269+K06269+K02209	yes
	map03015	9	43	112	3097	9.46232e-05	0.00358385	mRNA surveillance pathway	XM_003249277.2|K14294;XM_003250940.2|K14323;XM_006560415.1|K14411;XM_006560417.1|K14411;XM_006560762.1|K14407;XM_006561077.1|K14402;XM_006562343.1|K13126;XM_006562446.1|K14398;XM_006562447.1|K14398;XM_006562448.1|K14398;XM_006562757.1|K03456;XM_006563475.1|K04354;XM_006563476.1|K04354;XM_006563478.1|K04354;XM_006563479.1|K04354;XM_006563480.1|K04354;XM_006563481.1|K04354;XM_006563747.1|K14411;XM_…	XM_006566678.1|K14326;XM_006566679.1|K14326;XM_006566772.1|K11124;XM_006566773.1|K11124;XM_006566774.1|K11124;XM_393289.5|K11124;XM_393296.5|K06269;XM_393330.5|K14326;XM_623270.4|K06269	http://www.kegg.jp/pathway/map03015+K14326+K14326+K11124+K11124+K11124+K11124+K06269+K14326+K06269	yes
	map00310	6	20	115	3120	0.000288439	0.00971079	Lysine degradation	NM_001040277.1|K03242|K11419;NM_001171169.1|K03242|K11419;XM_006557922.1|K09188;XM_006557978.1|K11420;XM_006557979.1|K11420;XM_006561307.1|K03242|K11419;XM_006561309.1|K03242|K11419;XM_006561768.1|K00164;XM_006561769.1|K00164;XM_006561770.1|K00164;XM_006561771.1|K00164;XM_006561772.1|K00164;XM_006562148.1|K11427;XM_006564681.1|K13646;XM_006564696.1|K11433;XM_006565696.1|K06101;XM_006565697.1|K061…	XM_006564696.1|K11433;XM_006565696.1|K06101;XM_006565697.1|K06101;XM_006565699.1|K06101;XM_006565700.1|K06101;XM_006569703.1|K11423	http://www.kegg.jp/pathway/map00310+K11433+K06101+K06101+K06101+K06101+K11423	yes
	map04530	13	108	108	3032	0.000432745	0.0131122	Tight junction	NM_001162513.1|K01110;NM_001185105.1|K02105;NM_001185145.1|K05692;XM_003249290.2|K06069;XM_006557229.1|K01110;XM_006557230.1|K01110;XM_006557231.1|K01110;XM_006557232.1|K01110;XM_006557233.1|K01110;XM_006557234.1|K01110;XM_006557235.1|K01110;XM_006557798.1|K02105;XM_006557799.1|K02105;XM_006557800.1|K02105;XM_006557802.1|K02105;XM_006557803.1|K02105;XM_006558413.1|K03115;XM_006558414.1|K03115;XM_…	XM_006565696.1|K06101;XM_006565697.1|K06101;XM_006565699.1|K06101;XM_006565700.1|K06101;XM_006567232.1|K06107;XM_006567233.1|K06107;XM_006567234.1|K06107;XM_006567235.1|K06107;XM_006567236.1|K06107;XM_006567238.1|K06107;XM_006567239.1|K06107;XM_006567240.1|K06107;XM_392323.5|K06107	http://www.kegg.jp/pathway/map04530+K06101+K06101+K06101+K06101+K06107+K06107+K06107+K06107+K06107+K06107+K06107+K06107+K06107	yes
W4d VS Q4d	map04060	5	2	116	3138	1.28295e-06	0.000388734	Cytokine-cytokine receptor interaction	XM_001122118.3|K16621;XM_006560026.1|K04361;XM_006565621.1|K13578;XM_006565622.1|K13578;XM_006565623.1|K13578;XM_006571154.1|K04671;XM_391989.5|K13578	XM_006565621.1|K13578;XM_006565622.1|K13578;XM_006565623.1|K13578;XM_006571154.1|K04671;XM_391989.5|K13578	http://www.kegg.jp/pathway/map04060+K13578+K13578+K13578+K04671+K13578	yes
	map03013	15	91	106	3049	5.46004e-06	0.000827196	RNA transport	NM_001040277.1|K03242|K11419;NM_001171169.1|K03242|K11419;XM_001119855.3|K03680;XM_001120093.3|K13133;XM_001121690.3|K14307;XM_001122273.3|K13135;XM_001123155.3|K14296;XM_003249277.2|K14294;XM_003249713.2|K14525;XM_003250940.2|K14323;XM_003251674.2|K13151;XM_006557389.1|K02516;XM_006557390.1|K02516;XM_006558042.1|K14296;XM_006558443.1|K14308;XM_006558724.1|K03259;XM_006558725.1|K03259;XM_00655872…	XM_001121690.3|K14307;XM_001123155.3|K14296;XM_006558042.1|K14296;XM_006561992.1|K14307;XM_006561994.1|K14307;XM_006561995.1|K14307;XM_006562418.1|K03260;XM_006562419.1|K03260;XM_006562420.1|K03260;XM_006563662.1|K15516;XM_006563663.1|K15516;XM_006563664.1|K15516;XM_006563665.1|K15516;XM_393761.5|K07936;XM_394058.5|K15516	http://www.kegg.jp/pathway/map03013+K14307+K14296+K14296+K14307+K14307+K14307+K03260+K03260+K03260+K15516+K15516+K15516+K15516+K07936+K15516	yes
	map03015	10	42	111	3098	1.44069e-05	0.0014551	mRNA surveillance pathway	XM_003249277.2|K14294;XM_003250940.2|K14323;XM_006560415.1|K14411;XM_006560417.1|K14411;XM_006560762.1|K14407;XM_006561077.1|K14402;XM_006562343.1|K13126;XM_006562446.1|K14398;XM_006562447.1|K14398;XM_006562448.1|K14398;XM_006562757.1|K03456;XM_006563475.1|K04354;XM_006563476.1|K04354;XM_006563478.1|K04354;XM_006563479.1|K04354;XM_006563480.1|K04354;XM_006563481.1|K04354;XM_006563747.1|K14411;XM_…	XM_006565736.1|K08873;XM_006565737.1|K08873;XM_006566772.1|K11124;XM_006566773.1|K11124;XM_006566774.1|K11124;XM_006566932.1|K14408;XM_006566933.1|K14408;XM_393289.5|K11124;XM_393296.5|K06269;XM_623270.4|K06269	http://www.kegg.jp/pathway/map03015+K08873+K08873+K11124+K11124+K11124+K14408+K14408+K11124+K06269+K06269	yes
	map04112	4	5	117	3135	0.000196775	0.0149057	Cell cycle - Caulobacter	XM_006561808.1|K01358;XM_006561809.1|K01358;XM_006561810.1|K01358;XM_006561812.1|K01358;XM_006570674.1|K03544;XM_006570675.1|K03544;XM_006570676.1|K03544;XM_392540.5|K01358;XM_394615.5|K03544	XM_006570674.1|K03544;XM_006570675.1|K03544;XM_006570676.1|K03544;XM_394615.5|K03544	http://www.kegg.jp/pathway/map04112+K03544+K03544+K03544+K03544	yes
	map04113	6	22	115	3118	0.000444082	0.0269113	Meiosis - yeast	XM_003250926.2|K02214;XM_006558237.1|K03359;XM_006558305.1|K02542;XM_006558306.1|K02542;XM_006558307.1|K02542;XM_006558712.1|K03353;XM_006560465.1|K06639;XM_006560466.1|K06639;XM_006560467.1|K06639;XM_006560468.1|K06639;XM_006560469.1|K06639;XM_006560470.1|K06639;XM_006562757.1|K03456;XM_006564100.1|K03351;XM_006564101.1|K03351;XM_006565998.1|K02537;XM_006567869.1|K02209;XM_006569248.1|K06628;XM_…	XM_006558305.1|K02542;XM_006558306.1|K02542;XM_006558307.1|K02542;XM_393296.5|K06269;XM_623270.4|K06269;XM_623433.4|K02216	http://www.kegg.jp/pathway/map04113+K02542+K02542+K02542+K06269+K06269+K02216	yes
	map04350	7	35	114	3105	0.000744799	0.0376123	TGF-beta signaling pathway	XM_001122118.3|K16621;XM_006562757.1|K03456;XM_006563455.1|K04501;XM_006563456.1|K04501;XM_006563457.1|K04501;XM_006563458.1|K04501;XM_006563459.1|K04501;XM_006563460.1|K04501;XM_006563462.1|K04501;XM_006564347.1|K04678;XM_006565621.1|K13578;XM_006565622.1|K13578;XM_006565623.1|K13578;XM_006565641.1|K03347;XM_006566554.1|K04679;XM_006566555.1|K04679;XM_006566556.1|K04679;XM_006566557.1|K04679;XM_…	XM_006565621.1|K13578;XM_006565622.1|K13578;XM_006565623.1|K13578;XM_006570184.1|K04681;XM_006570185.1|K04681;XM_006571154.1|K04671;XM_391989.5|K13578	http://www.kegg.jp/pathway/map04350+K13578+K13578+K13578+K04681+K04681+K04671+K13578	yes
	map04911	0	188	121	2952	0.00111088	0.0480852	Insulin secretion	NM_001077808.1|K08043;NM_001134950.1|K04515;XM_001121773.3|K01540;XM_003250943.2|K05858;XM_006557715.1|K07299;XM_006557716.1|K07299;XM_006557717.1|K07299;XM_006557718.1|K07299;XM_006557719.1|K07299;XM_006557720.1|K07299;XM_006557721.1|K07299;XM_006557722.1|K07299;XM_006557723.1|K07299;XM_006557724.1|K07299;XM_006557725.1|K07299;XM_006557726.1|K07299;XM_006557728.1|K07299;XM_006558131.1|K04936;XM_…		http://www.kegg.jp/pathway/map04911+	yes
	map00270	5	18	116	3122	0.00127305	0.0482169	Cysteine and methionine metabolism	NM_001171051.1|K00558;XM_001120306.3|K00797;XM_001121325.3|K00016;XM_006560746.1|K08963;XM_006560747.1|K08963;XM_006560748.1|K08963;XM_006563125.1|K00815;XM_006564269.1|K00789;XM_006565023.1|K00797;XM_006569392.1|K00016;XM_006569393.1|K00016;XM_006569394.1|K00016;XM_006569395.1|K00016;XM_006569396.1|K00016;XM_006569397.1|K00016;XM_006569398.1|K00016;XM_006571208.1|K01251;XM_006571583.1|K00802;XM_…	XM_006560746.1|K08963;XM_006560747.1|K08963;XM_006560748.1|K08963;XM_006564269.1|K00789;XM_624149.4|K01251	http://www.kegg.jp/pathway/map00270+K08963+K08963+K08963+K00789+K01251	yes
W5d VS Q5d	map04070	21	52	128	3060	2.54e-12	7.7e-10	Phosphatidylinositol signaling system	NM_001162513.1|K01110;XM_001120893.3|K00889;XM_003250943.2|K05858;XM_006557229.1|K01110;XM_006557230.1|K01110;XM_006557231.1|K01110;XM_006557232.1|K01110;XM_006557233.1|K01110;XM_006557234.1|K01110;XM_006557235.1|K01110;XM_006557504.1|K00901;XM_006562217.1|K01099;XM_006562306.1|K01116;XM_006562668.1|K00901;XM_006562669.1|K00901;XM_006562670.1|K00901;XM_006562671.1|K00901;XM_006562673.1|K00901;XM_…	XM_006564708.1|K04958;XM_006564710.1|K04958;XM_006564711.1|K04958;XM_006564712.1|K04958;XM_006564713.1|K04958;XM_006564714.1|K04958;XM_006564715.1|K04958;XM_006564716.1|K04958;XM_006564717.1|K04958;XM_006564936.1|K00920;XM_006564937.1|K00920;XM_006565297.1|K00923;XM_006568607.1|K01109;XM_006568608.1|K01109;XM_006568609.1|K01109;XM_006568610.1|K01109;XM_006568611.1|K01109;XM_006568612.1|K01109;XM_…	http://www.kegg.jp/pathway/map04070+K04958+K04958+K04958+K04958+K04958+K04958+K04958+K04958+K04958+K00920+K00920+K00923+K01109+K01109+K01109+K01109+K01109+K01109+K01109+K01109+K00923	yes
	map00512	8	7	141	3105	7.74e-08	7.81e-06	Mucin type O-Glycan biosynthesis	XM_006558672.1|K00710;XM_006559760.1|K00710;XM_006559761.1|K00710;XM_006559762.1|K00710;XM_006563880.1|K00710;XM_006563881.1|K00710;XM_006563882.1|K00710;XM_006563884.1|K00710;XM_006565066.1|K00710;XM_006565068.1|K00710;XM_006565069.1|K00710;XM_006565070.1|K00710;XM_006565071.1|K00710;XM_394527.5|K00710;XM_397422.5|K00710	XM_006559760.1|K00710;XM_006559761.1|K00710;XM_006559762.1|K00710;XM_006563880.1|K00710;XM_006563881.1|K00710;XM_006563882.1|K00710;XM_006563884.1|K00710;XM_397422.5|K00710	http://www.kegg.jp/pathway/map00512+K00710+K00710+K00710+K00710+K00710+K00710+K00710+K00710	yes
	map04961	12	27	137	3085	7.18e-08	7.81e-06	Endocrine and other factor-regulated calcium reabsorption	XM_001121773.3|K01540;XM_003250943.2|K05858;XM_006559444.1|K07904;XM_006562576.1|K04634;XM_006562577.1|K04634;XM_006562578.1|K04634;XM_006562579.1|K04634;XM_006562581.1|K04634;XM_006564159.1|K01539;XM_006564160.1|K01539;XM_006564161.1|K01539;XM_006564162.1|K01539;XM_006564164.1|K01539;XM_006564165.1|K01539;XM_006564166.1|K01539;XM_006564369.1|K08049;XM_006566836.1|K04585;XM_006566837.1|K04585;XM_…	XM_006568406.1|K01528;XM_006568407.1|K01528;XM_006568408.1|K01528;XM_006568409.1|K01528;XM_006568410.1|K01528;XM_006568411.1|K01528;XM_006568412.1|K01528;XM_006568413.1|K01528;XM_006568414.1|K01528;XM_006568416.1|K01528;XM_006568417.1|K01528;XM_394399.5|K01528	http://www.kegg.jp/pathway/map04961+K01528+K01528+K01528+K01528+K01528+K01528+K01528+K01528+K01528+K01528+K01528+K01528	yes
	map05100	14	56	135	3056	1.98e-06	0.000150226	Bacterial invasion of epithelial cells	NM_001185105.1|K02105;NM_001185145.1|K05692;XM_003249595.2|K04438;XM_006557798.1|K02105;XM_006557799.1|K02105;XM_006557800.1|K02105;XM_006557802.1|K02105;XM_006557803.1|K02105;XM_006560103.1|K05704;XM_006560104.1|K05704;XM_006560218.1|K04438;XM_006563384.1|K05691;XM_006563385.1|K05691;XM_006564440.1|K05719;XM_006565333.1|K16939;XM_006565334.1|K16939;XM_006566286.1|K06279;XM_006566287.1|K06279;XM_…	XM_003249595.2|K04438;XM_006560218.1|K04438;XM_006568406.1|K01528;XM_006568407.1|K01528;XM_006568408.1|K01528;XM_006568409.1|K01528;XM_006568410.1|K01528;XM_006568411.1|K01528;XM_006568412.1|K01528;XM_006568413.1|K01528;XM_006568414.1|K01528;XM_006568416.1|K01528;XM_006568417.1|K01528;XM_394399.5|K01528	http://www.kegg.jp/pathway/map05100+K04438+K04438+K01528+K01528+K01528+K01528+K01528+K01528+K01528+K01528+K01528+K01528+K01528+K01528	yes
	map04726	10	28	139	3084	4.61e-06	0.000279139	Serotonergic synapse	XM_003250943.2|K05858;XM_006560902.1|K01593;XM_006560903.1|K01593;XM_006561558.1|K04157;XM_006561559.1|K04157;XM_006561560.1|K04157;XM_006561561.1|K04157;XM_006561562.1|K04157;XM_006562576.1|K04634;XM_006562577.1|K04634;XM_006562578.1|K04634;XM_006562579.1|K04634;XM_006562581.1|K04634;XM_006563134.1|K01593;XM_006563583.1|K08155;XM_006563584.1|K08155;XM_006563585.1|K08155;XM_006564708.1|K04958;XM_…	XM_006564708.1|K04958;XM_006564710.1|K04958;XM_006564711.1|K04958;XM_006564712.1|K04958;XM_006564713.1|K04958;XM_006564714.1|K04958;XM_006564715.1|K04958;XM_006564716.1|K04958;XM_006564717.1|K04958;XM_006568128.1|K04539	http://www.kegg.jp/pathway/map04726+K04958+K04958+K04958+K04958+K04958+K04958+K04958+K04958+K04958+K04539	yes
	map04721	12	46	137	3066	7.69e-06	0.000336156	Synaptic vesicle cycle	XM_001121312.3|K12302;XM_003251628.2|K02144;XM_006558663.1|K12302;XM_006558664.1|K12302;XM_006558665.1|K12302;XM_006558666.1|K12302;XM_006558667.1|K12302;XM_006561356.1|K12302;XM_006561357.1|K12302;XM_006562544.1|K12302;XM_006562545.1|K12302;XM_006562546.1|K12302;XM_006562557.1|K14636;XM_006563583.1|K08155;XM_006563584.1|K08155;XM_006563585.1|K08155;XM_006564915.1|K13504;XM_006564920.1|K13504;XM_…	XM_006568406.1|K01528;XM_006568407.1|K01528;XM_006568408.1|K01528;XM_006568409.1|K01528;XM_006568410.1|K01528;XM_006568411.1|K01528;XM_006568412.1|K01528;XM_006568413.1|K01528;XM_006568414.1|K01528;XM_006568416.1|K01528;XM_006568417.1|K01528;XM_394399.5|K01528	http://www.kegg.jp/pathway/map04721+K01528+K01528+K01528+K01528+K01528+K01528+K01528+K01528+K01528+K01528+K01528+K01528	yes
	map04730	9	23	140	3089	7.77e-06	0.000336156	Long-term depression	XM_001121536.3|K05207;XM_003250943.2|K05858;XM_006560969.1|K07376;XM_006561013.1|K05207;XM_006561014.1|K05207;XM_006562576.1|K04634;XM_006562577.1|K04634;XM_006562578.1|K04634;XM_006562579.1|K04634;XM_006562581.1|K04634;XM_006562757.1|K03456;XM_006564708.1|K04958;XM_006564710.1|K04958;XM_006564711.1|K04958;XM_006564712.1|K04958;XM_006564713.1|K04958;XM_006564714.1|K04958;XM_006564715.1|K04958;XM_…	XM_006564708.1|K04958;XM_006564710.1|K04958;XM_006564711.1|K04958;XM_006564712.1|K04958;XM_006564713.1|K04958;XM_006564714.1|K04958;XM_006564715.1|K04958;XM_006564716.1|K04958;XM_006564717.1|K04958	http://www.kegg.jp/pathway/map04730+K04958+K04958+K04958+K04958+K04958+K04958+K04958+K04958+K04958	yes
	map04144	18	109	131	3003	1.21e-05	0.000457731	Endocytosis	NM_001112672.2|K12186;XM_001120689.3|K11866;XM_001120893.3|K00889;XM_003249290.2|K06069;XM_003251873.2|K11981;XM_006557258.1|K12474;XM_006557542.1|K11248;XM_006557543.1|K11248;XM_006557545.1|K11248;XM_006557925.1|K12494;XM_006557926.1|K12494;XM_006557927.1|K12494;XM_006557928.1|K12494;XM_006557930.1|K12494;XM_006557937.1|K11866;XM_006558293.1|K05094;XM_006558603.1|K06069;XM_006558605.1|K06069;XM_…	XM_006557542.1|K11248;XM_006557543.1|K11248;XM_006557545.1|K11248;XM_006561133.1|K01115;XM_006562887.1|K12488;XM_006568406.1|K01528;XM_006568407.1|K01528;XM_006568408.1|K01528;XM_006568409.1|K01528;XM_006568410.1|K01528;XM_006568411.1|K01528;XM_006568412.1|K01528;XM_006568413.1|K01528;XM_006568414.1|K01528;XM_006568416.1|K01528;XM_006568417.1|K01528;XM_393119.5|K12493;XM_394399.5|K01528	http://www.kegg.jp/pathway/map04144+K11248+K11248+K11248+K01115+K12488+K01528+K01528+K01528+K01528+K01528+K01528+K01528+K01528+K01528+K01528+K01528+K12493+K01528	yes
	map00562	12	53	137	3059	2.63e-05	0.000885807	Inositol phosphate metabolism	NM_001162513.1|K01110;XM_001120513.3|K03103;XM_001120810.3|K00328;XM_001120893.3|K00889;XM_001121719.3|K03103;XM_003250943.2|K05858;XM_006557229.1|K01110;XM_006557230.1|K01110;XM_006557231.1|K01110;XM_006557232.1|K01110;XM_006557233.1|K01110;XM_006557234.1|K01110;XM_006557235.1|K01110;XM_006562217.1|K01099;XM_006562306.1|K01116;XM_006563319.1|K01106;XM_006564025.1|K01107;XM_006564027.1|K01107;XM_…	XM_006564936.1|K00920;XM_006564937.1|K00920;XM_006565297.1|K00923;XM_006568607.1|K01109;XM_006568608.1|K01109;XM_006568609.1|K01109;XM_006568610.1|K01109;XM_006568611.1|K01109;XM_006568612.1|K01109;XM_006568614.1|K01109;XM_393548.5|K01109;XM_396869.5|K00923	http://www.kegg.jp/pathway/map00562+K00920+K00920+K00923+K01109+K01109+K01109+K01109+K01109+K01109+K01109+K01109+K00923	yes
	map04114	14	76	135	3036	4.19e-05	0.0012687	Oocyte meiosis	NM_001077808.1|K08043;NM_001134950.1|K04515;XM_006558237.1|K03359;XM_006558712.1|K03353;XM_006559821.1|K06630;XM_006560505.1|K04515;XM_006560506.1|K04515;XM_006560507.1|K04515;XM_006560508.1|K04515;XM_006560509.1|K04515;XM_006560511.1|K04515;XM_006560512.1|K04515;XM_006560513.1|K04515;XM_006560514.1|K04515;XM_006560515.1|K04515;XM_006560516.1|K04515;XM_006560517.1|K04515;XM_006560518.1|K04515;XM_…	XM_006564100.1|K03351;XM_006564101.1|K03351;XM_006564708.1|K04958;XM_006564710.1|K04958;XM_006564711.1|K04958;XM_006564712.1|K04958;XM_006564713.1|K04958;XM_006564714.1|K04958;XM_006564715.1|K04958;XM_006564716.1|K04958;XM_006564717.1|K04958;XM_393296.5|K06269;XM_395376.4|K02602;XM_623270.4|K06269	http://www.kegg.jp/pathway/map04114+K03351+K03351+K04958+K04958+K04958+K04958+K04958+K04958+K04958+K04958+K04958+K06269+K02602+K06269	yes
	map04911	0	188	149	2924	0.000205906	0.00487668	Insulin secretion	NM_001077808.1|K08043;NM_001134950.1|K04515;XM_001121773.3|K01540;XM_003250943.2|K05858;XM_006557715.1|K07299;XM_006557716.1|K07299;XM_006557717.1|K07299;XM_006557718.1|K07299;XM_006557719.1|K07299;XM_006557720.1|K07299;XM_006557721.1|K07299;XM_006557722.1|K07299;XM_006557723.1|K07299;XM_006557724.1|K07299;XM_006557725.1|K07299;XM_006557726.1|K07299;XM_006557728.1|K07299;XM_006558131.1|K04936;XM_…		http://www.kegg.jp/pathway/map04911+	yes
	map05010	13	78	136	3034	0.00019552	0.00487668	Alzheimer's disease	NM_001011573.1|K05208;NM_001172403.1|K02267;XM_003249715.2|K02266;XM_003250744.2|K02134;XM_003250943.2|K05858;XM_006558013.1|K06704;XM_006559677.1|K05208;XM_006560106.1|K00413;XM_006560107.1|K00413;XM_006560109.1|K00413;XM_006560560.1|K04348;XM_006560561.1|K04348;XM_006560562.1|K04348;XM_006560563.1|K04348;XM_006560564.1|K04348;XM_006560565.1|K04348;XM_006560566.1|K04348;XM_006560567.1|K04348;XM_…	XM_006564708.1|K04958;XM_006564710.1|K04958;XM_006564711.1|K04958;XM_006564712.1|K04958;XM_006564713.1|K04958;XM_006564714.1|K04958;XM_006564715.1|K04958;XM_006564716.1|K04958;XM_006564717.1|K04958;XM_006564830.1|K02133;XM_006565605.1|K08852;XM_006566397.1|K03942;XM_392044.5|K08852	http://www.kegg.jp/pathway/map05010+K04958+K04958+K04958+K04958+K04958+K04958+K04958+K04958+K04958+K02133+K08852+K03942+K08852	yes
	map04540	9	38	140	3074	0.00020923	0.00487668	Gap junction	NM_001077808.1|K08043;XM_003250932.2|K07375;XM_003250943.2|K05858;XM_006558697.1|K07374;XM_006558698.1|K07374;XM_006558699.1|K07374;XM_006560026.1|K04361;XM_006560103.1|K05704;XM_006560104.1|K05704;XM_006560969.1|K07376;XM_006561558.1|K04157;XM_006561559.1|K04157;XM_006561560.1|K04157;XM_006561561.1|K04157;XM_006561562.1|K04157;XM_006562576.1|K04634;XM_006562577.1|K04634;XM_006562578.1|K04634;XM_…	XM_006564708.1|K04958;XM_006564710.1|K04958;XM_006564711.1|K04958;XM_006564712.1|K04958;XM_006564713.1|K04958;XM_006564714.1|K04958;XM_006564715.1|K04958;XM_006564716.1|K04958;XM_006564717.1|K04958	http://www.kegg.jp/pathway/map04540+K04958+K04958+K04958+K04958+K04958+K04958+K04958+K04958+K04958	yes
	map04723	10	48	139	3064	0.000230801	0.0049952	Retrograde endocannabinoid signaling	NM_001077808.1|K08043;XM_001121312.3|K12302;XM_003250303.2|K04441;XM_003250943.2|K05858;XM_006557236.1|K04440;XM_006557237.1|K04440;XM_006557238.1|K04440;XM_006557239.1|K04440;XM_006557241.1|K04440;XM_006557242.1|K04440;XM_006557243.1|K04440;XM_006557244.1|K04440;XM_006557245.1|K04440;XM_006558336.1|K13806;XM_006558663.1|K12302;XM_006558664.1|K12302;XM_006558665.1|K12302;XM_006558666.1|K12302;XM_…	XM_006564708.1|K04958;XM_006564710.1|K04958;XM_006564711.1|K04958;XM_006564712.1|K04958;XM_006564713.1|K04958;XM_006564714.1|K04958;XM_006564715.1|K04958;XM_006564716.1|K04958;XM_006564717.1|K04958;XM_006568128.1|K04539	http://www.kegg.jp/pathway/map04723+K04958+K04958+K04958+K04958+K04958+K04958+K04958+K04958+K04958+K04539	yes
	map04666	8	32	141	3080	0.000348026	0.00703012	Fc gamma R-mediated phagocytosis	XM_001120893.3|K00889;XM_001122803.3|K01080;XM_003249595.2|K04438;XM_006558097.1|K05743;XM_006560218.1|K04438;XM_006561133.1|K01115;XM_006562306.1|K01116;XM_006562887.1|K12488;XM_006565513.1|K06083;XM_006568453.1|K06083;XM_006568455.1|K06083;XM_006568456.1|K06083;XM_006568477.1|K05730;XM_006568478.1|K05730;XM_006569565.1|K05747;XM_006569566.1|K05747;XM_006570268.1|K02677;XM_006571069.1|K00889;XM_…	XM_003249595.2|K04438;XM_006558097.1|K05743;XM_006560218.1|K04438;XM_006561133.1|K01115;XM_006562887.1|K12488;XM_006568477.1|K05730;XM_006568478.1|K05730;XM_396603.5|K05743	http://www.kegg.jp/pathway/map04666+K04438+K05743+K04438+K01115+K12488+K05730+K05730+K05743	yes
	map03015	9	43	140	3069	0.000464348	0.00879359	mRNA surveillance pathway	XM_003249277.2|K14294;XM_003250940.2|K14323;XM_006560415.1|K14411;XM_006560417.1|K14411;XM_006560762.1|K14407;XM_006561077.1|K14402;XM_006562343.1|K13126;XM_006562446.1|K14398;XM_006562447.1|K14398;XM_006562448.1|K14398;XM_006562757.1|K03456;XM_006563475.1|K04354;XM_006563476.1|K04354;XM_006563478.1|K04354;XM_006563479.1|K04354;XM_006563480.1|K04354;XM_006563481.1|K04354;XM_006563747.1|K14411;XM_…	XM_003250940.2|K14323;XM_006565736.1|K08873;XM_006565737.1|K08873;XM_006566678.1|K14326;XM_006566679.1|K14326;XM_393296.5|K06269;XM_393330.5|K14326;XM_623270.4|K06269;XM_624891.4|K12812	http://www.kegg.jp/pathway/map03015+K14323+K08873+K08873+K14326+K14326+K06269+K14326+K06269+K12812	yes
	map04310	0	173	149	2939	0.00049511	0.0088246	Wnt signaling pathway	NM_001134950.1|K04515;NM_001185105.1|K02105;XM_003250943.2|K05858;XM_003251223.2|K04511;XM_006557236.1|K04440;XM_006557237.1|K04440;XM_006557238.1|K04440;XM_006557239.1|K04440;XM_006557241.1|K04440;XM_006557242.1|K04440;XM_006557243.1|K04440;XM_006557244.1|K04440;XM_006557245.1|K04440;XM_006557634.1|K04496;XM_006557636.1|K04496;XM_006557637.1|K04496;XM_006557638.1|K04496;XM_006557639.1|K04496;XM_…		http://www.kegg.jp/pathway/map04310+	yes
	map00310	6	20	143	3092	0.000885964	0.0141288	Lysine degradation	NM_001040277.1|K03242|K11419;NM_001171169.1|K03242|K11419;XM_006557922.1|K09188;XM_006557978.1|K11420;XM_006557979.1|K11420;XM_006561307.1|K03242|K11419;XM_006561309.1|K03242|K11419;XM_006561768.1|K00164;XM_006561769.1|K00164;XM_006561770.1|K00164;XM_006561771.1|K00164;XM_006561772.1|K00164;XM_006562148.1|K11427;XM_006564681.1|K13646;XM_006564696.1|K11433;XM_006565696.1|K06101;XM_006565697.1|K061…	XM_006557922.1|K09188;XM_006564696.1|K11433;XM_006565696.1|K06101;XM_006565697.1|K06101;XM_006565699.1|K06101;XM_006565700.1|K06101	http://www.kegg.jp/pathway/map00310+K09188+K11433+K06101+K06101+K06101+K06101	yes
	map04270	11	69	138	3043	0.00085858	0.0141288	Vascular smooth muscle contraction	NM_001077808.1|K08043;XM_003250943.2|K05858;XM_006557807.1|K12751;XM_006557808.1|K12751;XM_006557809.1|K12751;XM_006557810.1|K12751;XM_006557811.1|K12751;XM_006558131.1|K04936;XM_006558132.1|K04936;XM_006558133.1|K04936;XM_006558134.1|K04936;XM_006558135.1|K04936;XM_006558136.1|K04936;XM_006558137.1|K04936;XM_006558138.1|K04936;XM_006558139.1|K04936;XM_006558140.1|K04936;XM_006558141.1|K04936;XM_…	XM_006564708.1|K04958;XM_006564710.1|K04958;XM_006564711.1|K04958;XM_006564712.1|K04958;XM_006564713.1|K04958;XM_006564714.1|K04958;XM_006564715.1|K04958;XM_006564716.1|K04958;XM_006564717.1|K04958;XM_393296.5|K06269;XM_623270.4|K06269	http://www.kegg.jp/pathway/map04270+K04958+K04958+K04958+K04958+K04958+K04958+K04958+K04958+K04958+K06269+K06269	yes
	map04810	10	63	139	3049	0.0015228	0.0230704	Regulation of actin cytoskeleton	NM_001185145.1|K05692;XM_001120893.3|K00889;XM_003249595.2|K04438;XM_003251286.2|K04410;XM_003251742.2|K04358;XM_006558097.1|K05743;XM_006558293.1|K05094;XM_006558517.1|K07831;XM_006558518.1|K07831;XM_006560026.1|K04361;XM_006560103.1|K05704;XM_006560104.1|K05704;XM_006560218.1|K04438;XM_006561119.1|K07532;XM_006561121.1|K07532;XM_006564440.1|K05719;XM_006564936.1|K00920;XM_006564937.1|K00920;XM_…	XM_003249595.2|K04438;XM_006558097.1|K05743;XM_006560218.1|K04438;XM_006564936.1|K00920;XM_006564937.1|K00920;XM_006568477.1|K05730;XM_006568478.1|K05730;XM_393296.5|K06269;XM_396603.5|K05743;XM_623270.4|K06269	http://www.kegg.jp/pathway/map04810+K04438+K05743+K04438+K00920+K00920+K05730+K05730+K06269+K05743+K06269	yes
	map04720	11	76	138	3036	0.0017408	0.0251172	Long-term potentiation	NM_001011573.1|K05208;NM_001134950.1|K04515;XM_003250943.2|K05858;XM_006558816.1|K04353;XM_006558817.1|K04353;XM_006559677.1|K05208;XM_006560505.1|K04515;XM_006560506.1|K04515;XM_006560507.1|K04515;XM_006560508.1|K04515;XM_006560509.1|K04515;XM_006560511.1|K04515;XM_006560512.1|K04515;XM_006560513.1|K04515;XM_006560514.1|K04515;XM_006560515.1|K04515;XM_006560516.1|K04515;XM_006560517.1|K04515;XM_…	XM_006564708.1|K04958;XM_006564710.1|K04958;XM_006564711.1|K04958;XM_006564712.1|K04958;XM_006564713.1|K04958;XM_006564714.1|K04958;XM_006564715.1|K04958;XM_006564716.1|K04958;XM_006564717.1|K04958;XM_393296.5|K06269;XM_623270.4|K06269	http://www.kegg.jp/pathway/map04720+K04958+K04958+K04958+K04958+K04958+K04958+K04958+K04958+K04958+K06269+K06269	yes
	map01110	1	191	148	2921	0.00197443	0.0271933	Biosynthesis of secondary metabolites	XM_001120157.3|K00791;XM_001121325.3|K00016;XM_001121619.3|K01597;XM_001122899.3|K00804;XM_003249365.2|K00025;XM_003250244.2|K09478;XM_003251137.2|K00849;XM_006557294.1|K01785;XM_006557398.1|K00948;XM_006557399.1|K00948;XM_006557400.1|K00948;XM_006557401.1|K00948;XM_006557403.1|K00948;XM_006557582.1|K00844;XM_006557583.1|K00844;XM_006557585.1|K00844;XM_006557586.1|K00844;XM_006557824.1|K10720;XM_…	XM_623339.4|K01623	http://www.kegg.jp/pathway/map01110+K01623	yes
	map04918	9	55	140	3057	0.002174	0.02864	Thyroid hormone synthesis	NM_001077808.1|K08043;XM_001121773.3|K01540;XM_003250943.2|K05858;XM_006558860.1|K08054;XM_006558861.1|K08054;XM_006559658.1|K17231;XM_006562576.1|K04634;XM_006562577.1|K04634;XM_006562578.1|K04634;XM_006562579.1|K04634;XM_006562581.1|K04634;XM_006564159.1|K01539;XM_006564160.1|K01539;XM_006564161.1|K01539;XM_006564162.1|K01539;XM_006564164.1|K01539;XM_006564165.1|K01539;XM_006564166.1|K01539;XM_…	XM_006564708.1|K04958;XM_006564710.1|K04958;XM_006564711.1|K04958;XM_006564712.1|K04958;XM_006564713.1|K04958;XM_006564714.1|K04958;XM_006564715.1|K04958;XM_006564716.1|K04958;XM_006564717.1|K04958	http://www.kegg.jp/pathway/map04918+K04958+K04958+K04958+K04958+K04958+K04958+K04958+K04958+K04958	yes
	map04724	12	93	137	3019	0.00261115	0.0327538	Glutamatergic synapse	NM_001011573.1|K05208;NM_001077808.1|K08043;XM_001121312.3|K12302;XM_003250943.2|K05858;XM_006558659.1|K05202;XM_006558660.1|K05202;XM_006558661.1|K05202;XM_006558663.1|K12302;XM_006558664.1|K12302;XM_006558665.1|K12302;XM_006558666.1|K12302;XM_006558667.1|K12302;XM_006559122.1|K15010;XM_006559314.1|K15008;XM_006559677.1|K05208;XM_006560560.1|K04348;XM_006560561.1|K04348;XM_006560562.1|K04348;XM_…	XM_006561133.1|K01115;XM_006564708.1|K04958;XM_006564710.1|K04958;XM_006564711.1|K04958;XM_006564712.1|K04958;XM_006564713.1|K04958;XM_006564714.1|K04958;XM_006564715.1|K04958;XM_006564716.1|K04958;XM_006564717.1|K04958;XM_006568128.1|K04539;XM_006570870.1|K01915	http://www.kegg.jp/pathway/map04724+K01115+K04958+K04958+K04958+K04958+K04958+K04958+K04958+K04958+K04958+K04539+K01915	yes
	map04915	9	57	140	3055	0.00270246	0.0327538	Estrogen signaling pathway	NM_001077808.1|K08043;XM_003250943.2|K05858;XM_006558439.1|K04615;XM_006560026.1|K04361;XM_006560103.1|K05704;XM_006560104.1|K05704;XM_006562576.1|K04634;XM_006562577.1|K04634;XM_006562578.1|K04634;XM_006562579.1|K04634;XM_006562581.1|K04634;XM_006564369.1|K08049;XM_006564708.1|K04958;XM_006564710.1|K04958;XM_006564711.1|K04958;XM_006564712.1|K04958;XM_006564713.1|K04958;XM_006564714.1|K04958;XM_…	XM_006564708.1|K04958;XM_006564710.1|K04958;XM_006564711.1|K04958;XM_006564712.1|K04958;XM_006564713.1|K04958;XM_006564714.1|K04958;XM_006564715.1|K04958;XM_006564716.1|K04958;XM_006564717.1|K04958	http://www.kegg.jp/pathway/map04915+K04958+K04958+K04958+K04958+K04958+K04958+K04958+K04958+K04958	yes
